# Supplementary material for: Chronoradiobiology of Breast Cancer: The Time Is Now to Link Circadian Rhythm and Radiation Biology
Source: MDPI journal article supplement (doi:10.3390/ijms23031331), 2022-01-25
Supplement: s1 [file s1]

## Supplementary Materials

**Table S1.** Effect of time of day on radiation treatments for non-breast cancers. Any overall conclusions about a preferred radiation time are indicated in bold in the findings. See Table 3 for studies on the effect of time of day on radiation treatments for breast cancer. SRS = stereotactic radiosurgery, PBT = proton beam therapy.

| Cancer Site and Study                                                                                                                                                                                                                                 | Time of Radiotherapy for Other Cancers |                                                                                                                                                                                    |                                                                                 | Endpoints and Findings                                                                                                                                                                                                                                                                                                                               |
|-------------------------------------------------------------------------------------------------------------------------------------------------------------------------------------------------------------------------------------------------------|----------------------------------------|------------------------------------------------------------------------------------------------------------------------------------------------------------------------------------|---------------------------------------------------------------------------------|------------------------------------------------------------------------------------------------------------------------------------------------------------------------------------------------------------------------------------------------------------------------------------------------------------------------------------------------------|
|                                                                                                                                                                                                                                                       | Type                                   | Timing                                                                                                                                                                             | Radiation                                                                       |                                                                                                                                                                                                                                                                                                                                                      |
| Head and neck<br>Oral mucositis in morning vs. evening irradiated patients: a randomized prospective study                                                                                                                                            | Prospective randomized (n = 212)       | 8:00–11:00 vs. 15:00–18:00                                                                                                                                                         | Daily 2-Gy fractions 5×/week > 60 Gy with Cobalt- 60                            | Oral mucositis:<br>Trend toward increased grade 3 toxicity of mucositis in the evening group (not significant, p =0.08)<br>(Early preference)                                                                                                                                                                                                        |
| Head and neck<br>Comparison of toxicity associated with early morning versus late afternoon radiotherapy in patients with head-and-neck cancer: a prospective randomized trial of the National Cancer Institute of Canada Clinical Trials Group (HN3) | Prospective randomized (n = 205)       | 8:00–10:00 vs. 16:00–18:00                                                                                                                                                         | 66–70 Gy in 3–35 fractions                                                      | Grade 3 mucositis:<br>Grade 3 mucositis higher in evening group (62% vs. 53%) for all patients (not significant, p = 0.17)<br>Grade 3 mucositis significantly higher in evening group for smokers receiving >66 Gy (p = 0.024)<br>Less weight loss noted in the morning group<br>(Early preference)                                                  |
| Head and neck<br>The impact of delivery daytime and seasonality of radiotherapy for head and neck cancer on toxicity burden                                                                                                                           | Retrospective (n = 617)                | Seasonality:<br>Median day of radiotherapy falling after March equinox (“light”) vs. after September equinox (“dark”) Time of day: median radiotherapy time before vs. after 12:00 | ≥60 Gy, definitive or adjuvant, ±chemotherapy                                   | Acute toxicity, late toxicity:<br>Higher acute toxicity with radiotherapy delivered in the “dark” half of the year (p = 0.0127)<br>Time of day was not associated with toxicities analyzed; trend toward higher acute toxicity in the afternoon (p = 0.0387, did not meet authors’ criteria)<br>(Early preference)                                   |
| Cervical<br>Circadian variation in radiation-induced intestinal mucositis in patients with cervical carcinoma                                                                                                                                         | Prospective randomized (n = 229)       | 8:00–10:00 vs. 18:00–20:00                                                                                                                                                         | 50 Gy in 25 fractions using Cobalt- 60                                          | Multiple toxicities:<br>Increased grade 3+ diarrhea in the morning group (p < 0.01)<br>Other toxicities increased in morning group (not significant)<br>(Late preference)<br>GI toxicity, hematological toxicity, apoptotic potential:<br>Increased grade 3+ GI toxicity in the morning group (75% vs. 58% diarrhea, 13% vs. 6% high-grade toxicity) |
| Cervical<br>Research on radiotherapy at different times of the day for inoperable cervical cancer                                                                                                                                                     | Prospective randomized (n = 67)        | 9:00–11:00 vs. 21:00–23:00                                                                                                                                                         | 50 Gy in 25 fractions external beam and 36–42 Gy in 6–7 fractions brachytherapy | Worse hematologic toxicity in afternoon group<br>Levels of PER1, PER2, CLOCK correlated with apoptosis<br>(Ambivalent preference)                                                                                                                                                                                                                    |

|                                                                                                                                                                               |                              |                                                                                          |                                                                              |                                                                                                                                                                                                                                                                                                                                                                                                                                                                                                                                                                                                                                                                                                                                                                                                                                                                                                                                                                                          |
|-------------------------------------------------------------------------------------------------------------------------------------------------------------------------------|------------------------------|------------------------------------------------------------------------------------------|------------------------------------------------------------------------------|------------------------------------------------------------------------------------------------------------------------------------------------------------------------------------------------------------------------------------------------------------------------------------------------------------------------------------------------------------------------------------------------------------------------------------------------------------------------------------------------------------------------------------------------------------------------------------------------------------------------------------------------------------------------------------------------------------------------------------------------------------------------------------------------------------------------------------------------------------------------------------------------------------------------------------------------------------------------------------------|
| Prostate<br>Differences in toxicity and outcome associated with circadian variations between patients undergoing daytime and evening radiotherapy for prostate adenocarcinoma | Retrospective (n = 409)      | Before vs. after 17:00                                                                   | High-dose radiotherapy (median dose 78 Gy without elective pelvis treatment) | Toxicity, failure-free survival:<br>Increased grade 2+ late GI toxicity for patients older than 70 in the afternoon group ( $p < 0.001$ )<br>Poorer 5-year failure-free survival for afternoon group ( $p = 0.05$ ) (Early preference)<br>Urinary tract symptoms, quality of life:<br>Morning PBT ameliorated quality of life and lower urinary tract symptoms from localized prostate cancer compared to near-noon or late afternoon groups under multiple linear regression ( $p < 0.05$ ) (Early preference)                                                                                                                                                                                                                                                                                                                                                                                                                                                                          |
| Prostate<br>Chronoradiation Therapy for Prostate Cancer: Morning Proton Beam Therapy Ameliorates Worsening Lower Urinary Tract Symptoms                                       | Prospective cohort (n = 168) | 08:30–10:30 vs. 10:31–14:30 vs. 14:31–16:30                                              | PBT 78 Gy in 39 fractions or 70 Gy in 28 fractions                           | Tumor response, staging:<br>Increased complete pathologic response ( $p = 0.035$ ) and nodal downstaging in afternoon group (Late preference)<br>Local control, distant CNS control, progression-free survival, overall survival:<br>No difference in overall survival ( $p = 0.76$ ) or progression free survival ( $p = 0.30$ )<br>Univariate analysis showed improved overall survival if treated in the morning ( $p = 0.05$ ) (Early preference)<br>Overall survival:<br>No difference in overall survival for total group<br>Univariate analysis showed survival difference for elderly women with $\geq 70\%$ or $\geq 80\%$ WBRT received in a single time window ( $p = 0.02$ ) (Preference for consistent timing)<br>Overall survival, local control:<br>Univariate analysis showed decreased overall survival ( $p = 0.016$ ) and local control ( $p = 0.012$ ) in the later time group<br>Effect not reproduced on multivariate analysis with confounders (Early preference) |
| Rectal<br>Does chronomodulated radiotherapy improve pathological response in locally advanced rectal cancer?                                                                  | Retrospective (n = 155)      | Before vs. after 12:00                                                                   | 25–50.4 Gy neo-adjuvantly                                                    |                                                                                                                                                                                                                                                                                                                                                                                                                                                                                                                                                                                                                                                                                                                                                                                                                                                                                                                                                                                          |
| Brain (high-grade glioma)<br>Clinical effects of morning and afternoon radiotherapy on high-grade gliomas                                                                     | Retrospective (n = 109)      | Before vs. after 12:00                                                                   | 60 Gy conventional fractionation, hypo fractionation for frail patients      |                                                                                                                                                                                                                                                                                                                                                                                                                                                                                                                                                                                                                                                                                                                                                                                                                                                                                                                                                                                          |
| Brain metastases<br>Could time of whole brain radiotherapy delivery impact overall survival in patients with multiple brain metastases?                                       | Retrospective (n = 755)      | 8:00–11:00 vs. 11:00–14:00 vs. 14:00–17:00                                               | WBRT, 30 Gy in 10 fractions (93%) and 20 Gy in 5 fractions                   |                                                                                                                                                                                                                                                                                                                                                                                                                                                                                                                                                                                                                                                                                                                                                                                                                                                                                                                                                                                          |
| Brain metastases from lung (NSCLC)<br>Impact of time of day on outcomes after stereotactic radiosurgery for non-small cell lung cancer brain metastases                       | Retrospective (n = 437)      | 9:12–11:40 vs. 11:41–18:02 (determined with receiver operating characteristics analysis) | SRS 18–20 Gy                                                                 |                                                                                                                                                                                                                                                                                                                                                                                                                                                                                                                                                                                                                                                                                                                                                                                                                                                                                                                                                                                          |
| Brain metastases from lung (NSCLC)<br>The effect of treatment time on outcome in non-small cell lung                                                                          | Retrospective (n = 172)      | Before vs. after 12:00                                                                   | SRS treatment to 1 lesion, median dose 21 Gy                                 | Overall survival, local control:<br>No difference in overall survival or local control seen; linac-based SRS                                                                                                                                                                                                                                                                                                                                                                                                                                                                                                                                                                                                                                                                                                                                                                                                                                                                             |

|                                                                                                                                                        |                                  |                                            |                                         |                                                                                                                                                                                                                                       |
|--------------------------------------------------------------------------------------------------------------------------------------------------------|----------------------------------|--------------------------------------------|-----------------------------------------|---------------------------------------------------------------------------------------------------------------------------------------------------------------------------------------------------------------------------------------|
| cancer brain metastases treated with stereotactic radiosurgery                                                                                         |                                  |                                            |                                         | can be effectively delivered in the morning or afternoon<br>(No preference)                                                                                                                                                           |
| Brain metastases from lung (NSCLC)                                                                                                                     |                                  |                                            |                                         | Survival, CNS vs. systemic cause of death:                                                                                                                                                                                            |
| Gamma knife radiosurgery for brain metastasis of non-small cell lung cancer: is there a difference in outcome between morning and afternoon treatment? | Retrospective (n = 97)           | 10:00–12:30 vs. 12:30–15:00                | SRS with GammaKnife, mean dose 18.6 Gy  | Improved local control and overall survival for morning group (p = 0.014, 0.025)<br>(Early preference)                                                                                                                                |
| Bone metastases                                                                                                                                        |                                  |                                            |                                         | Pain palliation:                                                                                                                                                                                                                      |
| Effects of circadian rhythms and treatment times on the response of radiotherapy for painful bone metastases                                           | Retrospective (n = 194)          | 8:00–11:00 vs. 11:00–14:00 vs. 14:00–17:00 | 8 Gy, 20 Gy, 30 Gy                      | Improved pain control (clinical response) if treated 11:00 to 14:00 group, detected for females only (p = 0.02)<br>(Midday preference)                                                                                                |
| Nasopharyngeal, Esophageal, Lung, Cervical                                                                                                             |                                  |                                            |                                         | Toxicity, short-term tumor shrinkage:                                                                                                                                                                                                 |
| The clinical effect study on malignant tumors with chronoradiotherapy                                                                                  | Prospective randomized (n = 121) | 9:00 vs. 21:00                             | Radiotherapy regimens varied by disease | Evening radiation gave significantly lower toxicity for all cancers<br>Evening radiation significantly increased tumor shrinkage for esophageal, cervical; similar nonsignificant trend for lung, nasopharyngeal<br>(Late preference) |

**Table S2.** Zeitgeber-driven chronoradiotherapy. Hypothetical individualized regimen that synergizes light, clock-acting medication, and diet to improve breast cancer response to radiation treatment and patient outcome.

| Hypothetical Cancer with Optimal Radiation Therapeutic Index at 12:00h;<br>Patient's Fractionated Radiation Treatments Scheduled for 09:00h Daily |                                                              |                                                |
|---------------------------------------------------------------------------------------------------------------------------------------------------|--------------------------------------------------------------|------------------------------------------------|
| Light–Dark                                                                                                                                        | Chronopharmaceutical                                         | Dietary                                        |
| 30 min blue light before bedtime (until DLMO shifts to 03:00h)                                                                                    | 20 mg tasimelteon every morning (until DLMO shifts to 3:00h) | Timed feeding such that midday falls at 15:00h |
| Avoid bright light in the morning                                                                                                                 | Fix 24-h period with KL001                                   | Intermittent fasting between meals             |
| Confirm patient's circadian phase with biomarkers (e.g., clock gene expression) at 09:00h each session just before radiation                      |                                                              |                                                |
